# Supplementary material
Source: PubMed Central journal article supplement (PMC4833530)
Supplement: NIHMS714414-supplement-Supplemental_Data_File__doc__pdf__etc__.pdf [file NIHMS714414-supplement-Supplemental_Data_File__doc__pdf__etc__.pdf]

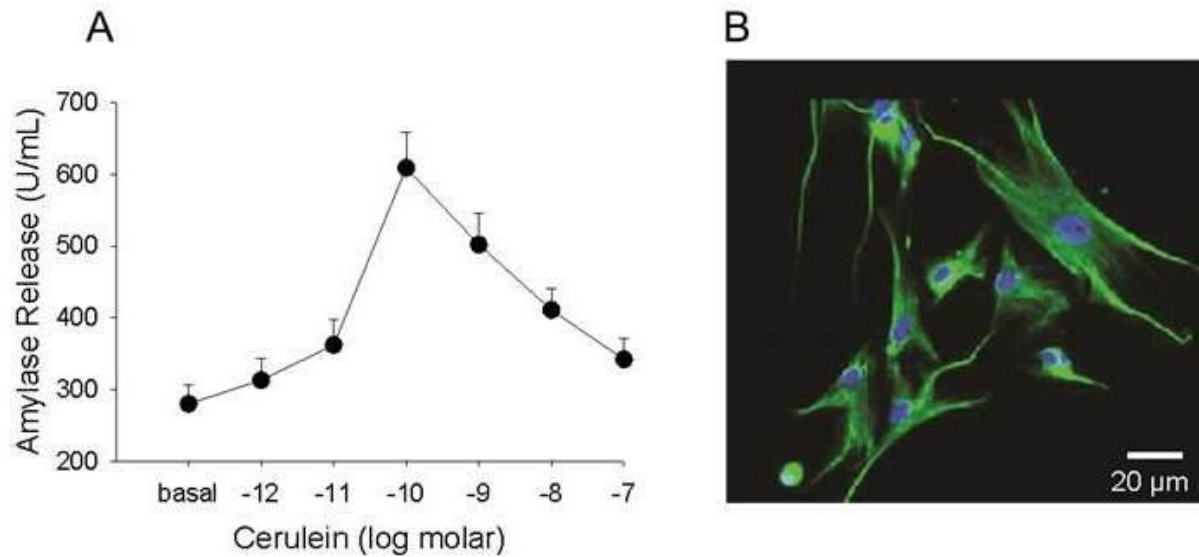

### Characterization of acinar cells and PSCs

**(A) Amylase secretion in response to cerulein.** Primary acinar cells were treated with the indicated concentrations of cerulein for 2 h. Amylase secretion was measured using the Phadebas<sup>®</sup> Amylase Test kit (Lund, Sweden). Each point is the mean  $\pm$  SEM of data obtained from 3 independent experiments.

**(B) Vimentin immunofluorescence in PSCs.** Fixed cells were co-incubated with anti-vimentin antibody (Santa Cruz Biotechnology) overnight. After washing 3 times with TBST, the sections were incubated in the dark for 1 h with Alexa Fluor 488. The cell nucleus was stained with DAPI (blue).
